# Supplementary material
Source: PubMed Central journal article supplement (PMC9098730)
Supplement: 40487_2022_187_MOESM1_ESM.pdf [file 40487_2022_187_MOESM1_ESM.pdf]

## **SUPPLEMENTARY MATERIAL**

### **Estimating the Impact of Delayed Access to Oncology Drugs on Patient Outcomes in Canada**

Jackie Vanderpuye-Orgle PhD, MSc,<sup>1</sup> Daniel Erim MD, PhD, MSc,<sup>1</sup> Yi Qian PhD,<sup>2</sup>  
Devon J. Boyne PhD,<sup>3,4</sup> Winson Y. Cheung MD, MPH,<sup>3,4</sup> Gwyn Bebb, BMBCCh, PhD,<sup>2,3</sup>  
Ariel Shah, MBA,<sup>2</sup> Louisa Pericleous, PhD,<sup>5</sup> Maciej Maruszczak, MSc,<sup>6</sup> Darren R.  
Brenner PhD<sup>3,4</sup>

<sup>1</sup> Advanced Analytics, HEOR and RWE, Parexel International, Billerica, MA, USA

<sup>2</sup> Amgen Inc, Thousand Oaks, CA, USA

<sup>3</sup> University of Calgary, Department of Oncology, Calgary, Alberta, Canada

<sup>4</sup> Oncology Outcomes (O2) Initiative, University of Calgary, Alberta, Canada

<sup>5</sup> Amgen Canada Inc, Mississauga, Ontario, Canada

<sup>6</sup> Advanced Analytics, HEOR and RWE, Parexel International, London, UK

Corresponding author: Dr Jackie Vanderpuye-Orgle

Email: Jackie.Vanderpuye-Orgle@parexel.com

**Supplementary Table 1: CADTH-pCODR-approved indications for reimbursement of nivolumab, afatinib, and pemetrexed**

| Oncology drug | Indication approved for reimbursement                                                                                                                                                                                                                                                                                                            |
|---------------|--------------------------------------------------------------------------------------------------------------------------------------------------------------------------------------------------------------------------------------------------------------------------------------------------------------------------------------------------|
| Nivolumab     | Adults (age 18+ years) with advanced or metastatic (stage IIIB or IV or recurrent) squamous or non-squamous NSCLC with disease progression during or after cytotoxic chemotherapy for advanced disease and have a good performance status (ECOG 0, 1, possibly $\geq 2$ ).                                                                       |
| Afatinib      | Adults (age 18+ years) with <i>EGFR</i> mutation-positive, advanced or metastatic (stage IIIB or IV or recurrent) squamous or non-squamous NSCLC (adenocarcinoma) with good performance status (ECOG 0, 1, possibly $\geq 2$ ) as first-line treatment.                                                                                          |
| Pemetrexed    | Maintenance therapy in adults (age 18+ years) following first-line treatment with pemetrexed and cisplatin for advanced or metastatic (stage IIIB or IV or recurrent) non-squamous NSCLC with ECOG performance status of 0 or 1 following induction with four cycles of pemetrexed plus cisplatin with good performance status (ECOG $\leq 1$ ). |

CADTH, Canadian Agency for Drugs and Technologies in Health; ECOG, European Cooperative Oncology Group; *EGFR*, epidermal growth factor receptor; NSCLC, non-small cell lung cancer; pCODR, pan-Canadian Oncology Drug Review.

**Supplementary Table 2: Estimates of median survival within clinical trials used as basis of evidence in CADTH-pCODR submissions**

| Metric/indicator                                                                       | Nivolumab           | Afatinib <sup>a</sup>             | Pemetrexed             |
|----------------------------------------------------------------------------------------|---------------------|-----------------------------------|------------------------|
| Comparator treatment                                                                   | CM-057: Docetaxel   | LUX-Lung 3: Pemetrexed-cisplatin  | PARAMOUNT: Placebo     |
|                                                                                        | CM-017: Docetaxel   | LUX-Lung 6: Gemcitabine-cisplatin |                        |
|                                                                                        |                     | LUX-Lung 7: Gefitinib             |                        |
| Median overall survival in active treatment arm                                        | CM-057: 12.2 months | LUX-Lung 3: 28.2 months           | PARAMOUNT: 16.9 months |
|                                                                                        | CM-017: 9.2 months  | LUX-Lung 6: 23.6 months           |                        |
|                                                                                        | Pooled: 11.1 months | LUX-Lung 7: 27.9 months           |                        |
| Median overall survival in comparator treatment arm                                    | CM-057: 9.4 months  | LUX-Lung 3: 28.2 months           | PARAMOUNT: 14.0 months |
|                                                                                        | CM-017: 6.0 months  | Lux-Lung 6: 23.6 months           |                        |
|                                                                                        | Pooled: 8.1 months  | LUX-Lung 7: 25.0 months           |                        |
| Absolute difference in median overall survival                                         | CM-057: 2.8 months  | LUX-Lung 3: 4.2 months            | PARAMOUNT: 2.9 months  |
|                                                                                        | CM-017: 3.4 months  | LUX-Lung 6: –                     |                        |
|                                                                                        |                     | Lux-Lung 7: 2.5 months            |                        |
| Increase in median survival relative to median survival in comparator arm <sup>b</sup> | CM-057: 29.8%       | LUX-Lung 3: 0.0%                  | PARAMOUNT: 20.7%       |
|                                                                                        | CM-017: 56.7%       | LUX-Lung 6: -2.1%                 |                        |
|                                                                                        |                     | LUX-Lung 7: 11.6%                 |                        |

<sup>a</sup> Note: the lack of difference in overall survival for LUX-Lung 3 and 6 likely due to treatment switching

<sup>b</sup> Estimated as follows: (median overall survival in active arm – median overall survival in control arm)/median overall survival in control arm.

CADTH, Canadian Agency for Drugs and Technologies in Health; pCODR, pan-Canadian Oncology Drug Review.

**Supplementary Table 3:** Breakdown of epidemiologic and economic impacts of delays in access to nivolumab on Canadian patients with NSCLC.

|                           | Canadian NSCLC patients (2017) |                                      | Patients affected by indicated delays |              |                        |            | Epidemiologic & economic impacts |            | Economic value of QALYs lost |                |
|---------------------------|--------------------------------|--------------------------------------|---------------------------------------|--------------|------------------------|------------|----------------------------------|------------|------------------------------|----------------|
|                           | Patients diagnosed             | Patients with appropriate indication | Health Canada                         | CADTH/ pCODR | Provincial authorities | Total      | Person-years of life lost        | QALYs lost | \$50,000/QALY                | \$100,000/QALY |
| Alberta                   | 2200                           | 203                                  | 0                                     | 7            | 18                     | 25         | 8                                | 4.8        | \$0.2 M                      | \$0.5 M        |
| British Columbia          | 3050                           | 281                                  | 0                                     | 9            | 0                      | 9          | 3                                | 1.8        | \$0.1 M                      | \$0.2 M        |
| Manitoba                  | 910                            | 84                                   | 0                                     | 3            | 3                      | 6          | 2                                | 1.1        | \$0.1 M                      | \$0.1 M        |
| New Brunswick             | 710                            | 66                                   | 0                                     | 2            | 11                     | 13         | 4                                | 2.6        | \$0.1 M                      | \$0.3 M        |
| Newfoundland and Labrador | 540                            | 50                                   | 0                                     | 2            | 21                     | 23         | 7                                | 4.4        | \$0.2 M                      | \$0.4 M        |
| Nova Scotia               | 950                            | 88                                   | 0                                     | 3            | 7                      | 10         | 3                                | 2.0        | \$0.1 M                      | \$0.2 M        |
| Ontario                   | 10,600                         | 977                                  | 0                                     | 32           | 53                     | 86         | 26                               | 16.5       | \$0.8 M                      | \$1.6 M        |
| Prince Edward Island      | 135                            | 13                                   | 0                                     | 0            | 18                     | 19         | 6                                | 3.6        | \$0.2 M                      | \$0.4 M        |
| Quebec                    | 8700                           | 802                                  | 0                                     | 0            | 31                     | 31         | 9                                | 5.9        | \$0.3 M                      | \$0.6 M        |
| Saskatchewan              | 790                            | 73                                   | 0                                     | 2            | 4                      | 7          | 2                                | 1.3        | \$0.1 M                      | \$0.1 M        |
| <b>Total</b>              | <b>28,585</b>                  | <b>2637</b>                          | <b>0</b>                              | <b>61</b>    | <b>169</b>             | <b>229</b> | <b>70</b>                        | <b>44</b>  | <b>\$2.2 M</b>               | <b>\$4.4 M</b> |

CADTH, Canadian Agency for Drugs and Technologies in Health; M, million; NSCLC, non-small cell lung cancer; pCODR, pan-Canadian Oncology Drug Review; QALY, quality-adjusted life year. Submission to Health Canada was made pre-NOC (Notice of Compliance), thus any delay within Health Canada would overlap with the duration of review at CADTH/pCODR.

All costs are in CA\$

**Supplementary Table 4:** Breakdown of epidemiologic and economic impacts of delays in access to afatinib, on Canadian patients with NSCLC.

|                           | Canadian NSCLC patients (2014) |                               | Patients affected by indicated delays |               |                    |              | Epidemiologic & economic impacts |                   | Economic value of QALYs lost |                       |
|---------------------------|--------------------------------|-------------------------------|---------------------------------------|---------------|--------------------|--------------|----------------------------------|-------------------|------------------------------|-----------------------|
|                           | <i>Patients</i>                | <i>Patients with</i>          | <i>Health</i>                         | <i>CADTH/</i> | <i>Provincial</i>  | <i>Total</i> | <i>Person-years</i>              | <i>QALYs lost</i> | <i>\$50,000/QALY</i>         | <i>\$100,000/QALY</i> |
|                           | <i>diagnosed</i>               | <i>appropriate indication</i> | <i>Canada</i>                         | <i>pCODR</i>  | <i>authorities</i> |              |                                  |                   |                              |                       |
| Alberta                   | 2250                           | 422                           | 0                                     | 102           | 49                 | 150          | 34                               | 22.1              | \$1.1 M                      | \$2.2 M               |
| British Columbia          | 3185                           | 597                           | 0                                     | 144           | 70                 | 214          | 48                               | 31.6              | \$1.6 M                      | \$3.2 M               |
| Manitoba                  | 930                            | 175                           | 0                                     | 42            | 28                 | 70           | 16                               | 10.3              | \$0.5 M                      | \$1.0 M               |
| New Brunswick             | 790                            | 148                           | 0                                     | 36            | 9                  | 45           | 10                               | 6.6               | \$0.3 M                      | \$0.7 M               |
| Newfoundland and Labrador | 505                            | 95                            | 0                                     | 23            | 74                 | 97           | 22                               | 14.3              | \$0.7 M                      | \$1.4 M               |
| Nova Scotia               | 995                            | 187                           | 0                                     | 45            | 68                 | 113          | 25                               | 16.6              | \$0.8 M                      | \$1.7 M               |
| Ontario                   | 8790                           | 1646                          | 0                                     | 397           | 0                  | 397          | 89                               | 58.4              | \$2.9 M                      | \$5.8 M               |
| Prince Edward Island      | 155                            | 30                            | 0                                     | 7             | 65                 | 73           | 16                               | 10.7              | \$0.5 M                      | \$1.1 M               |
| Quebec                    | 8200                           | 1535                          | 0                                     | 0             | 2622               | 2622         | 586                              | 386.5             | \$19.3 M                     | \$38.6 M              |
| Saskatchewan              | 740                            | 139                           | 0                                     | 33            | 10                 | 44           | 10                               | 6.4               | \$0.3 M                      | \$0.6 M               |
| <b>Total</b>              | 26,540                         | 4974                          | 0                                     | 829           | 2997               | 3825         | 855                              | 564               | \$28.2 M                     | \$56.4 M              |

CADTH, Canadian Agency for Drugs and Technologies in Health; M, million; NSCLC, non-small cell lung cancer; pCODR, pan-Canadian Oncology Drug Review; QALY, quality-adjusted life year. Submission to Health Canada was made pre-Notice of Compliance; thus, any delay within Health Canada would overlap with the duration of review at CADTH/pCODR.

All costs are in CA\$

**Supplementary Table 5:** Breakdown of epidemiologic and economic impacts of delays in access to pemetrexed on Canadian patients with NSCLC.

|                           | Canadian NSCLC patients (2014) |                                             | Patients affected by indicated delays |                     |                               |              | Epidemiologic & economic impacts |                   | Economic value of QALYs lost |                       |
|---------------------------|--------------------------------|---------------------------------------------|---------------------------------------|---------------------|-------------------------------|--------------|----------------------------------|-------------------|------------------------------|-----------------------|
|                           | <i>Patients diagnosed</i>      | <i>Patients with appropriate indication</i> | <i>Health Canada</i>                  | <i>CADTH/ pCODR</i> | <i>Provincial authorities</i> | <i>Total</i> | <i>Person-years of life lost</i> | <i>QALYs lost</i> | <i>\$50,000/QALY</i>         | <i>\$100,000/QALY</i> |
|                           | Alberta                        | 2250                                        | 721                                   | Unavailable         | 0                             | 116          | 116                              | 40                | 25.4                         | \$1.3 M               |
| British Columbia          | 3185                           | 1020                                        | Unavailable                           | 0                   | 165                           | 165          | 57                               | 36.0              | \$1.8 M                      | \$3.6 M               |
| Manitoba                  | 930                            | 298                                         | Unavailable                           | 0                   | 73                            | 73           | 25                               | 16.0              | \$0.8 M                      | \$1.6 M               |
| New Brunswick             | 790                            | 253                                         | Unavailable                           | 0                   | 126                           | 126          | 44                               | 27.5              | \$1.4 M                      | \$2.8 M               |
| Newfoundland and Labrador | 505                            | 162                                         | Unavailable                           | 0                   | 13                            | 13           | 4                                | 2.8               | \$0.1 M                      | \$0.3 M               |
| Nova Scotia               | 995                            | 319                                         | Unavailable                           | 0                   | 25                            | 25           | 9                                | 5.5               | \$0.3 M                      | \$0.6 M               |
| Ontario                   | 8790                           | 2815                                        | Unavailable                           | 0                   | 224                           | 224          | 77                               | 48.8              | \$2.4 M                      | \$4.9 M               |
| Prince Edward Island      | 155                            | 50                                          | Unavailable                           | 0                   | 86                            | 86           | 30                               | 18.8              | \$0.9 M                      | \$1.9 M               |
| Quebec                    | 8200                           | 2626                                        | Unavailable                           | 0                   | 1524                          | 1524         | 528                              | 332.9             | \$16.6 M                     | \$33.3 M              |
| Saskatchewan              | 740                            | 237                                         | Unavailable                           | 0                   | 0                             | 0            | 0                                | 0.0               | \$0.0 M                      | \$0.0 M               |
| <b>Total</b>              | 26,540                         | 8501                                        | Unavailable                           | 0                   | 2353                          | 2353         | 816                              | 514               | \$25.7 M                     | \$51.4 M              |

CADTH, Canadian Agency for Drugs and Technologies in Health; M, million; NSCLC, non-small cell lung cancer; pCODR, pan-Canadian Oncology Drug Review; QALY, quality-adjusted life year.

All costs are in CA\$

**Supplementary Figure 1 (Panel A):** Current drug approval and funding process in Canada

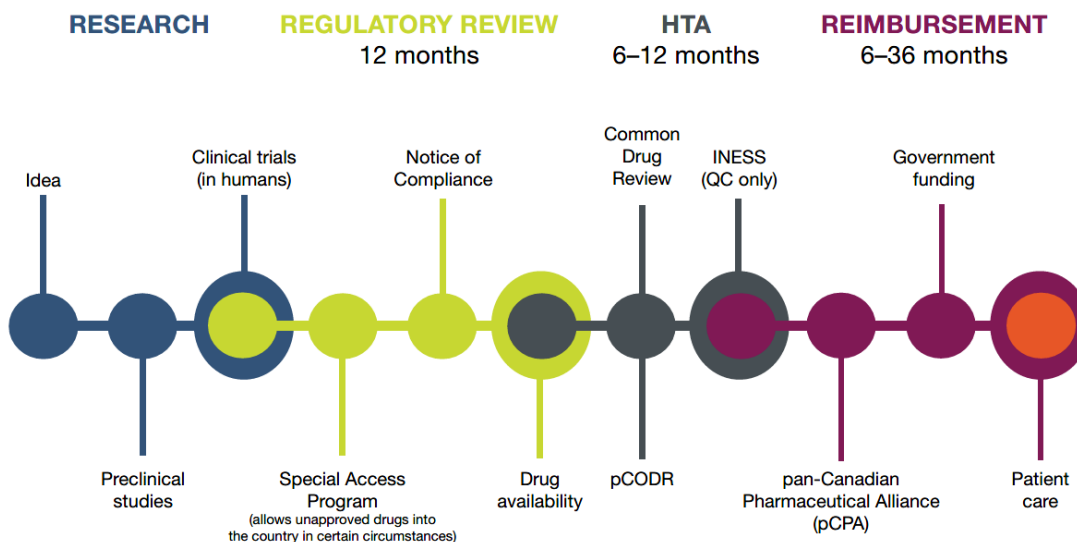

**Supplementary Figure 1 (Panel B):** Sources of delayed access considered

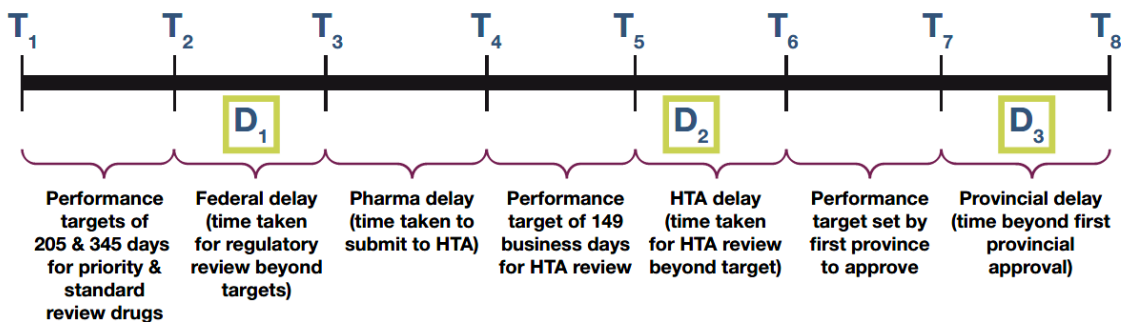

- >  $T_1$  = Date of submission to Health Canada
  - >  $T_2$  = Performance benchmarks
  - >  $T_3$  = Notice of Compliance (NOC) from Health Canada
  - >  $T_4$  = Date of submission to CADTH-pCODR
  - >  $T_5$  = Performance benchmark
  - >  $T_6$  = Notification to Implement (NOI) from CADTH-pCODR
  - >  $T_7$  = First province approves for reimbursement
  - >  $T_8$  = Subsequent provinces approve
- >  $D_1$  = Federal delay
  - >  $D_2$  = HTA delay
  - >  $D_3$  = Provincial delay

CADTH, Canadian Agency for Drugs and Technologies in Health; HTA, health technology assessment; INESS, Institut National d'Excellence en Santé et en Services Sociaux; pCODR, CADTH pan-Canadian Oncology Drug Review.

**Supplementary Figure 2:** Identification of patients eligible for nivolumab in the Southern Alberta Lung Cancer database

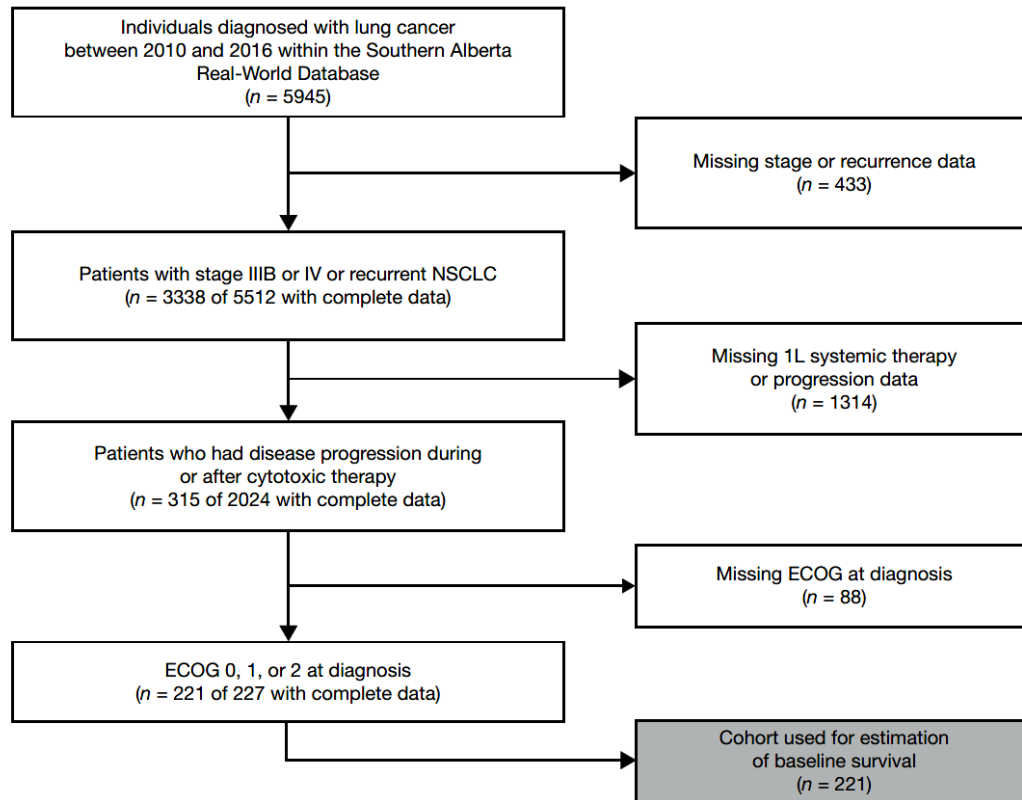

1L, first line; ECOG, Eastern Cooperative Oncology Group; NSCLC, non-small cell lung cancer.

The proportion of NSCLC patients with an appropriate indication for nivolumab was estimated thus:  $(3338/5512) \times (315/2024) \times (221/227) = 9.2\%$ . Median overall survival was estimated using survival data from 221 patients in the indicated cohort.



**Supplementary Figure 3:** Identification of patients eligible for afatinib in the Southern Alberta Lung Cancer database

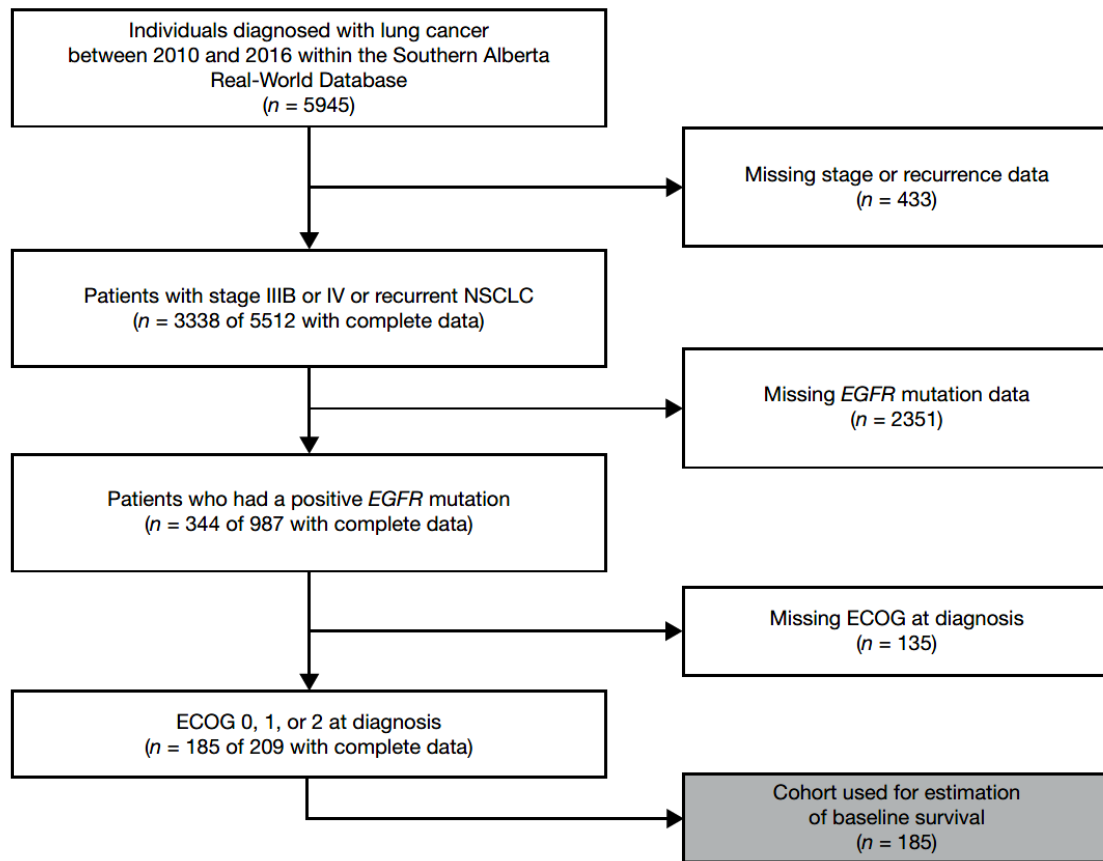

ECOG, Eastern Cooperative Oncology Group; *EGFR*, epidermal growth factor receptor; NSCLC, non-small cell lung cancer.

The proportion of NSCLC patients with appropriate indication for afatinib was estimated thus:  $(3338/5512) \times (344/987) \times (185/209) = 18.7\%$ . Median overall survival was estimated using survival data from 185 patients in the indicated cohort.

**Supplementary Figure 4:** Identification of patients eligible for pemetrexed in the Southern Alberta Lung Cancer database

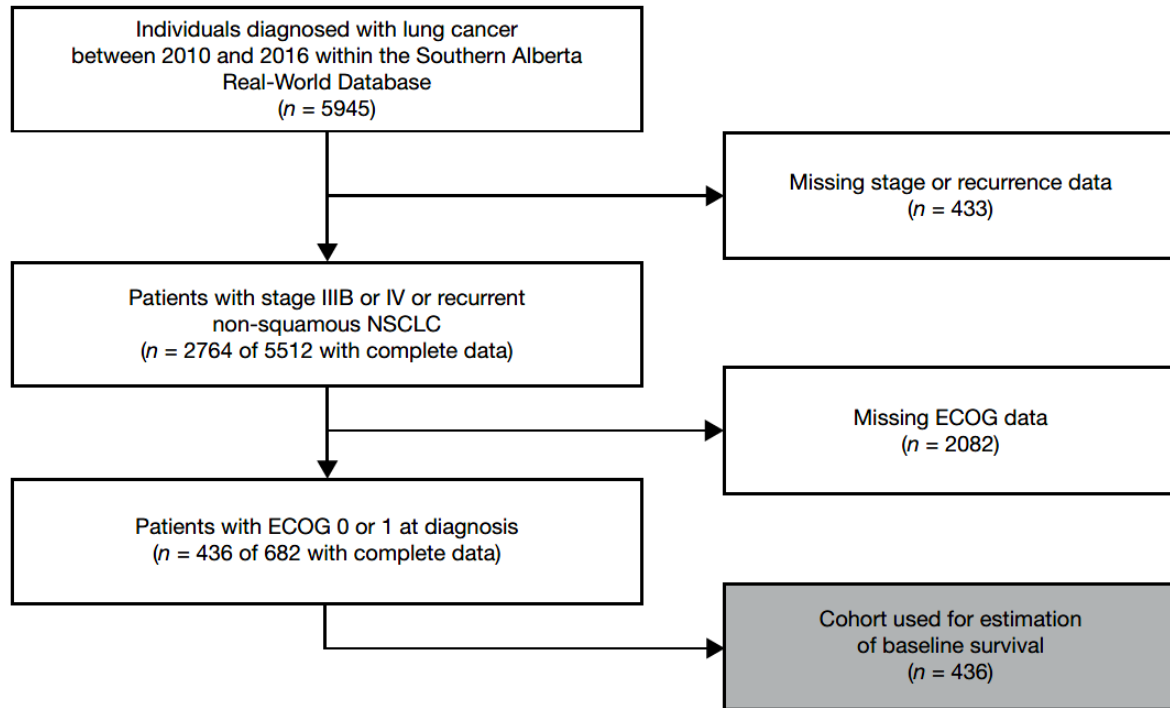

ECOG, Eastern Cooperative Oncology Group; NSCLC, non-small cell lung cancer.

The proportion of NSCLC patients with appropriate indication for pemetrexed was estimated thus:  $(2764/5512) \times (436/682) = 32.0\%$ . Median overall survival was estimated using survival data from 436 patients in the indicated cohort.
